# Supplementary figures and images for: Predictive Value of Modified Glasgow Prognostic Score and Persistent Inflammation among Patients with Non-Small Cell Lung Cancer Treated with Durvalumab Consolidation after Chemoradiotherapy: A Multicenter Retrospective Study
Source: MDPI journal article supplement (doi:10.3390/cancers15174358), 2023-09-01

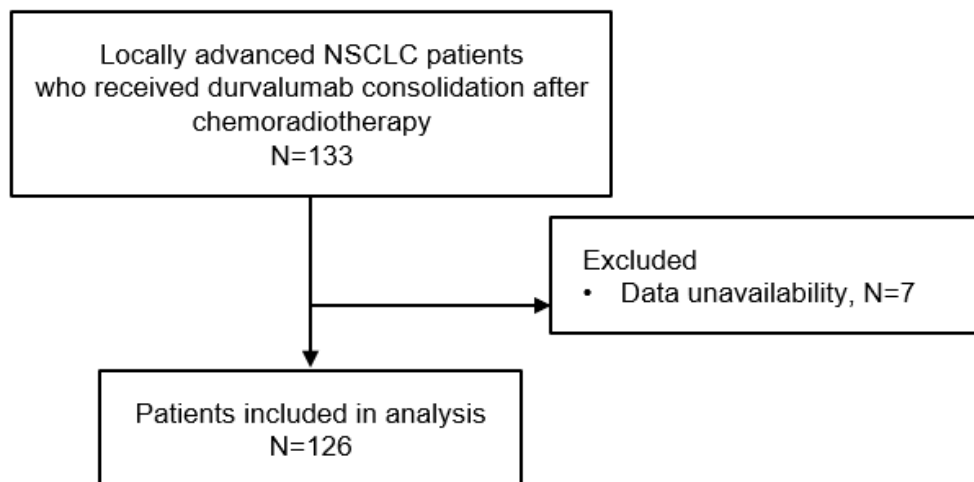

**Figure S1.** Patient flow-diagram.

Supplement: s1 [file s1]
